# Supplementary material for: Real-World Effectiveness of Inactivated COVID-19 Vaccines in Zimbabwe during the Omicron Variant Dominance: A Test-Negative Case-Control Study
Source: Preprints.org preprint supplement (doi:10.20944/preprints202409.1789.v1), 2024-09-24
Supplement: Supplementary file 1 [file supplementary]

Supplementary Tables

Table S1: Reasons for Screening Failure

| **Reason** | **N** |
| --- | --- |
| Fewer than 3 symptoms | 2781 |
| Under 18 years of age | 138 |
| Not willing to participate | 355 |
| Non eligible vaccine type | 393 |
| Other |  |
| Not Interested | 438 |
| Fear of blood draw and swab draw | 20 |
| Feeling too sick | 136 |
| Fear of COVID-19 NP[[1]](#footnote-2) swab | 38 |
| RA discretion (e.g. lives far away, intoxicated) | 21 |
| Total Screened | 9626 |
| Total Screen Failure | 4320 (44.9%) |

Table S2 Symptoms on presentation

| **Variable** | **Total** | **Cases (%)** | **Controls (%)** | **p-value** |
| --- | --- | --- | --- | --- |
| **Symptoms** | | | | |
| Acute Fever | 2052/5168 (39.7) | 353/701 (50.4) | 1699/4467 (38.0) | <0.001 |
| Acute Cough | 4063/5168 (78.6) | 577/701 (82.3) | 3486/4467 (78.0) | 0.010 |
| General weakness | 3049/5168 (59.0) | 462/701 (65.9) | 2587/4467 (57.9) | <0.001 |
| Headache | 4381/5168 (84.8) | 565/701 (80.6) | 3816/4467 (85.4) | 0.001 |
| Muscle pains | 1761/5168 (34.1) | 264/701 (37.7) | 1497/4467 (33.5) | 0.031 |
| Sore throat | 3472/5168 (67.2) | 453/701 (64.6) | 3019/4467 (67.6) | 0.120 |
| Runny nose | 3539/5168 (68.5) | 483/701 (68.9) | 3056/4467 (68.4) | 0.796 |
| Shortness of breath | 1390/5168 (26.9) | 190/701 (27.1) | 1200/4467 (26.9) | 0.894 |
| Loss of appetite | 2649/5168 (51.3) | 342/701 (48.8) | 2307/4467 (51.7) | 0.159 |
| Diarrhea | 489/5168 (9.5) | 58/701 (8.3) | 431/4467 (9.7) | 0.248 |
| Altered mental status | 170/5168 (3.3) | 32/701 (4.6) | 138/4467 (3.1) | 0.042 |

Table S3 Vaccination status and demographic profile

| **Variable** | **Vaccinated (%)*** | **Unvaccinated (%)** | **Total (%)** | **p-value** |
| --- | --- | --- | --- | --- |
| **Age (median, IQR)** | 37 (27 - 46) | 30 (23 - 39) | 36 (27 - 45) | <0.001 |
| **Age-group** | | | | |
| 18-49 | 3531/4274 (82.6) | 800/877 (91.2) | 4347/5151 (84.1) | <0.001 |
| 50-64 | 603/4274 (14.1) | 54/877 (6.2) | 659/5151 (12.8) |  |
| 65+ | 140/4274 (3.3) | 23/877 (2.6) | 163/5151 (3.2) |  |
| **Gender** | | | | |
| Male | 2925/4274 (68.4) | 599/877 (68.3) | 3535/5151 (68.4) | 0.937 |
| Female | 1349/4274 (31.6) | 278/877 (31.7) | 1634/5151 (31.6) |  |
| **Enrolment site** | | | | |
| Hospital outpatient or ER | 1215/4274 (28.4) | 423/877 (48.2) | 1638/5151 (31.8) | <0.001 |
| Hospitalized In-patient | 3010/4274 (70.4) | 432/877 (49.3) | 3442/5151 (66.8) |  |
| Community Outpatient | 49/4274 (1.2) | 22/877 (2.5) | 71/5151 (1.4) |  |
| **Socio-economic status** | | | | |
| Low | 2145/4282 (50.3) | 611/876 (69.8) | 2756/5140 (53.6) | <0.001 |
| Middle | 2010/4282 (47.1) | 247/876 (28.2) | 2257/5140 (43.9) |  |
| High | 109/4264 (2.6) | 18/876 (2.1) | 127/5140 (2.5) |  |
| **Ethnicity** |  |  |  |  |
| Asian, not Indian | 7/4266 (0.2) | 1/877 (0.1) | 8/5143 (0.2) | 0.773 |
| Black | 4243/4266 (99.5) | 871/877 (99.3) | 5114/5143 (99.4) |  |
| Indian | 3/4266 (0.1) | 1/877 (0.1) | 4/5143 (0.1) |  |
| Mixed | 5/4266 (0.1) | 1/877 (0.1) | 6/5143 (0.1) |  |
| White | 5/4266 (0.1) | 3/877 (0.3) | 8/5143 (0.2) |  |
| Other | 3/4266 (0.1) | 0 | 3/5143 (0.1) |  |

Table S4 Comorbid conditions by vaccination status

| **Variable** | **Vaccinated N(%)** | **Unvaccinated N(%)** | **Total N(%)** | **p-value** |
| --- | --- | --- | --- | --- |
| **BMI (median, IQR)** | 25 (22 – 30) | 24 (21 – 28) | 25 (22 – 30) | <0.001 |
| **BMI range** | | | | |
| <18 | 87/4177 (2.1) | 37/873 (4.2) | 124/5050 (2.5) | <0.001 |
| 18-24.9 | 1699/4177 (40.7) | 440/873 (50.4) | 2139/5050 (42.4) |  |
| 25-29.9 | 1257/4177 (30.1) | 249/873 (28.5) | 1506/5050 (29.8) |  |
| ≥30 | 1134/4177 (27.2) | 147/873 (16.8) | 1281/5050 (25.4) |  |
| **Medical comorbidities** | | | | |
| Hypertension | 684/4257 (16.1) | 78/877 (8.9) | 762/5134 (14.8) | <0.001 |
| Diabetes | 139/4256 (3.3) | 14/877 (1.6) | 153/5133 (3.0) | 0.008 |
| Dementia | 4/4256 (0.1) | 2/877 (0.2) | 6/5133 (0.1) | 0.465 |
| Chronic kidney disease | 10/4256 (0.2) | 3/877 (0.3) | 13/51533 (0.3) | 0.566 |
| Asthma | 123/4272 (2.9) | 16/877 (1.8) | 139/5149 (2.7) | 0.079 |
| Tuberculosis | 26/3633 (0.7) | 13/674 (1.9) | 39/4307 (0.9) | 0.002 |
| HIV status | 923/4147 (22.3) | 213/871 (24.5) | 1136/5018 (22.6) | 0.159 |
| On ART | 779/794 (98.1) | 170/182 (93.4) | 949/976 (97.2) | <0.001 |
| Currently smoking | 229/4223 (5.4) | 81/876 (9.3) | 310/5099 (6.1) | <0.001 |
| Cancer | 26/4257 (0.6) | 1/877 (0.1) | 27/5134 (0.5) | 0.064 |
| Pregnancy | 194/2464 (7.9) | 92/457 (20.1) | 286/2921 (9.8) | <0.001 |
| High risk occupation | 2062/4268 (48.3) | 172/877 (19.6) | 2234/5145 (43.3) | <0.001 |
| Previous COVID diagnosis | 1456/4210 (34.6) | 228/871 (26.2) | 1684/5081 (33.1) | <0.001 |

Table S5Table of vaccine verification

| **Source of vaccination information** | **N (%)** |
| --- | --- |
| Confirmed by phone call later | 274 (8.3) |
| Digital image submission | 372 (11.3) |
| Inspection of Clinic vaccination register | 41 (1.2) |
| Vaccine card inspection | 2610 (79.2) |

1. NP: Nasopharyngeal [↑](#footnote-ref-2)
